# Supplementary material
Source: publisher figshare collection journal article supplement (https://springernature.figshare.com/ndownloader/files/25613356)
Supplement: Supplementary file [file 25613356]

## Supplementary Information

**Table S1. Meteorological and gaseous data measured by the EPA Guting air quality monitoring stations during the study period**

| Meteorological and gaseous data (unit) | Mean $\pm$ SD (Min~Max)    |
|----------------------------------------|----------------------------|
| Temperature (°C)                       | 20.2 $\pm$ 5.0 (5.4~31.1)  |
| Relative humidity (%)                  | 80.8 $\pm$ 9.6 (54.9~96.1) |
| NO <sub>2</sub> (ppb)                  | 21.6 $\pm$ 6.3 (10.0~50.0) |
| SO <sub>2</sub> (ppb)                  | 2.6 $\pm$ 1.1 (0.9~8.3)    |
| O <sub>3</sub> (ppb)                   | 26.3 $\pm$ 10.7 (2.0~84.3) |

NO<sub>2</sub>: nitrogen dioxides; SO<sub>2</sub>: sulfur dioxide; O<sub>3</sub>: ozone.

## Supplementary Information

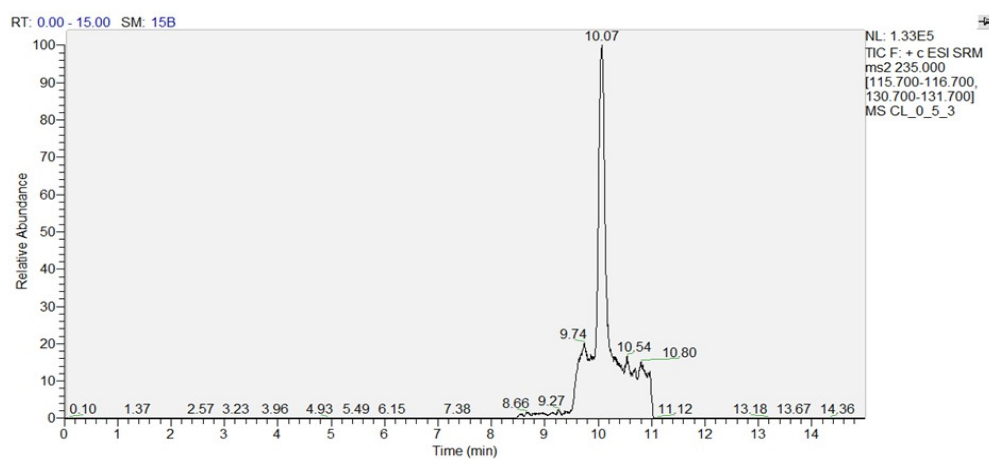

**Figure S1.** Spectrums of MDA analysed by LC-MS/MS.

## Supplementary Information

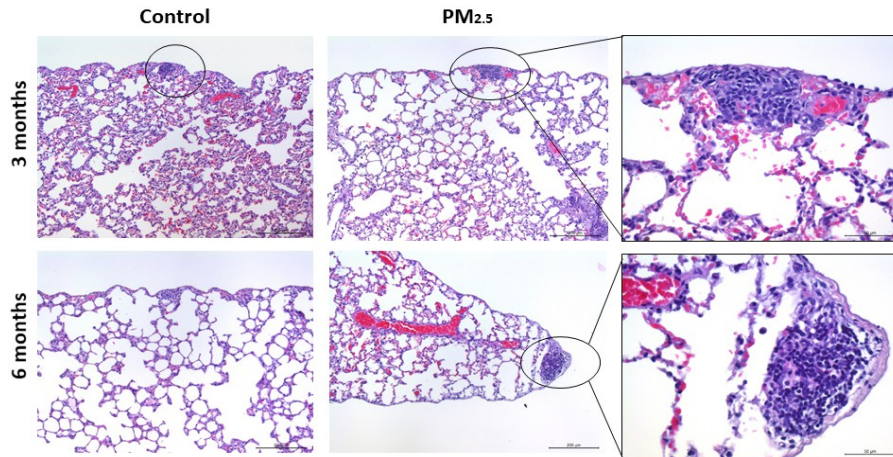

**Figure S2.** Effects (3- and 6-months exposure) of PM<sub>2.5</sub> on the inflammatory infiltration of lungs in SH rats. Subpleural alveolar infiltration of mononuclear cells was observed in the lungs after 3- and 6-months exposure of HEPA and/or PM<sub>2.5</sub>.

## Supplementary Information

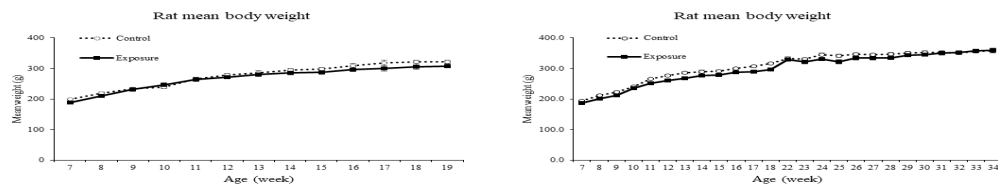

**Figure S3.** Alteration in body weight of SH rats between HEPA (control) and PM<sub>2.5</sub> (exposure) groups after 6-months exposure.

## Supplementary Information

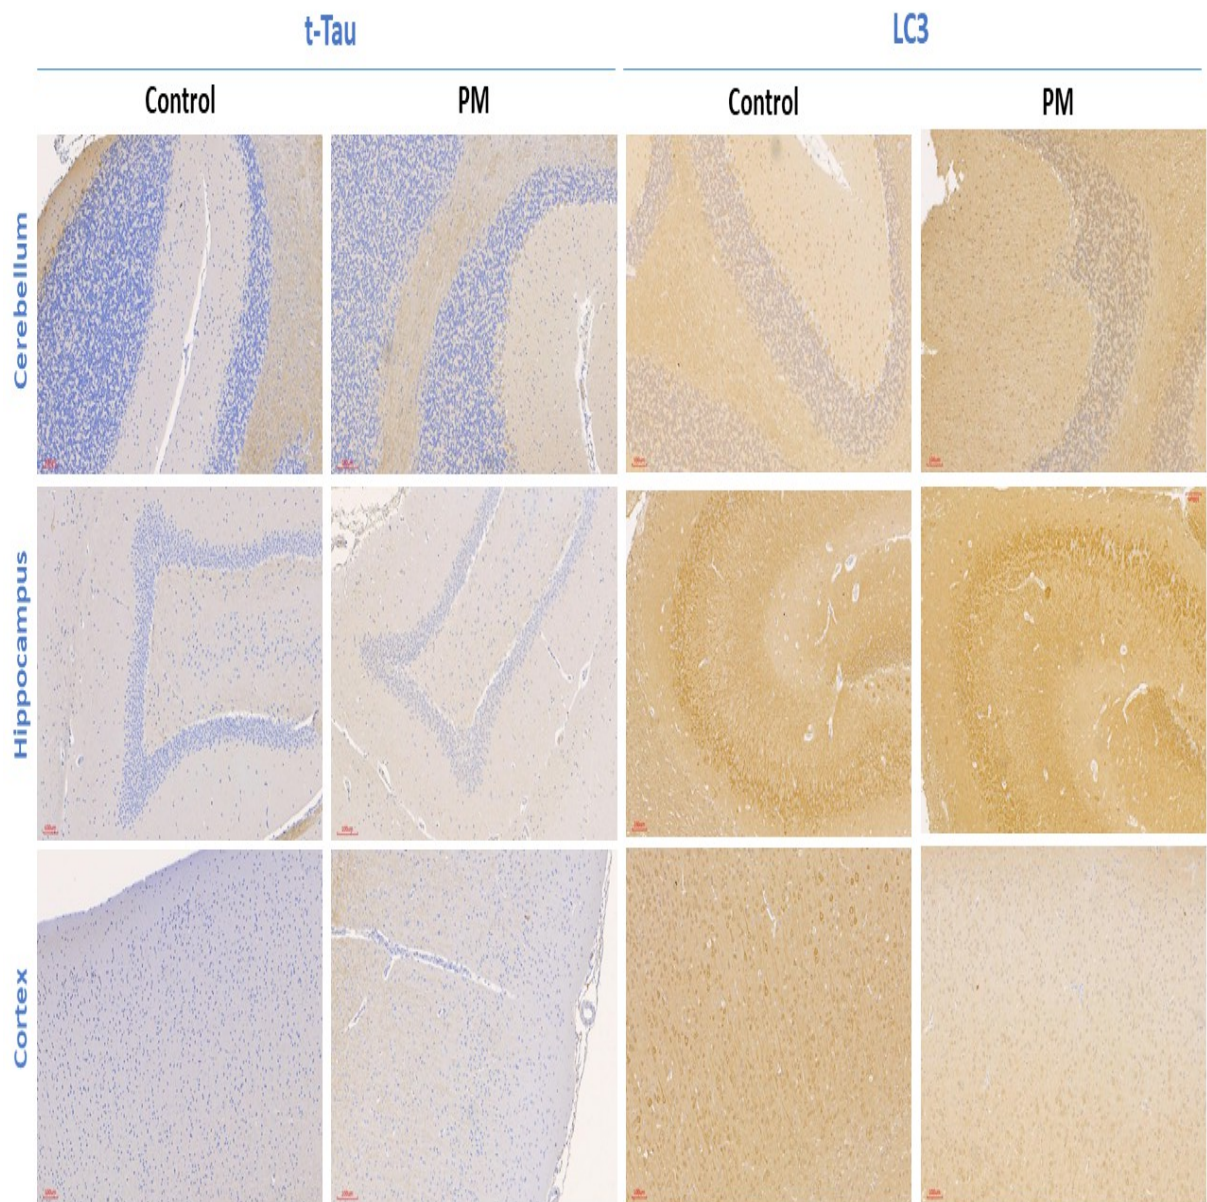

**Figure S4.** IHC images of total Tau (t-Tau) in the cerebellum, hippocampus, and cortex of SH rats after 6 months of exposure to HEPA (control) and PM<sub>2.5</sub> (exposure). Scar bar is 50  $\mu$ m.



## Supplementary Information

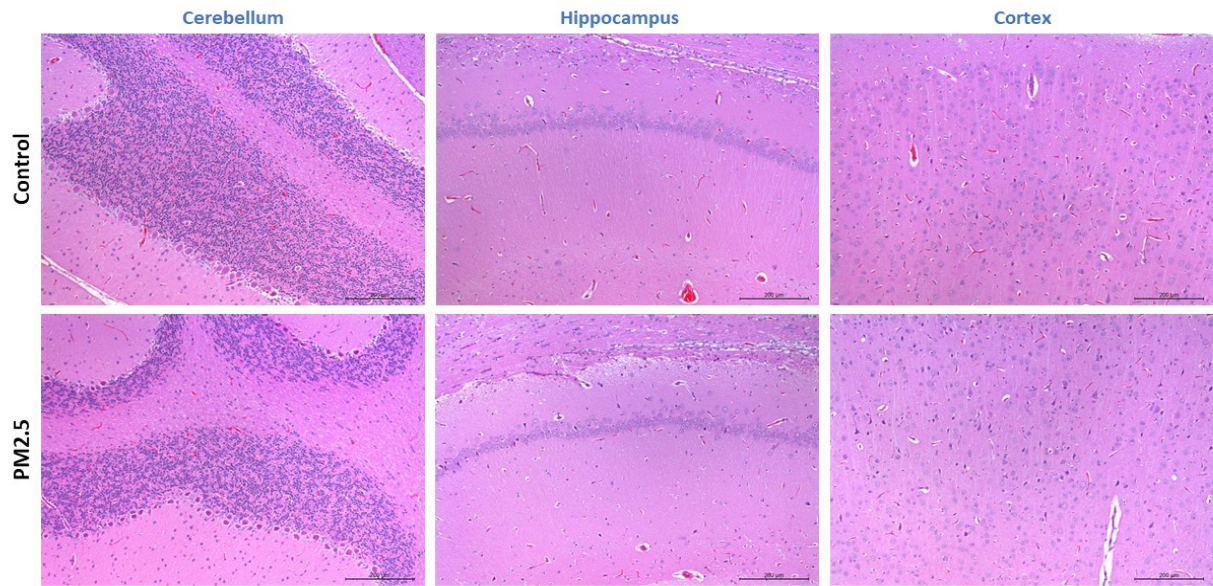

**Figure S5.** Chronic effects (6-months exposure) of PM<sub>2.5</sub> on the histological changes of cerebellum, hippocampus, and cortex in SH rats. scale bar: 200 μm
